# Supplementary material for: Comparative Analysis on the Evolution of Flowering Genes in Sugar Pathway in Brassicaceae
Source: MDPI journal article supplement (doi:10.3390/genes13101749), 2022-09-27
Supplement: s1 [file s1]

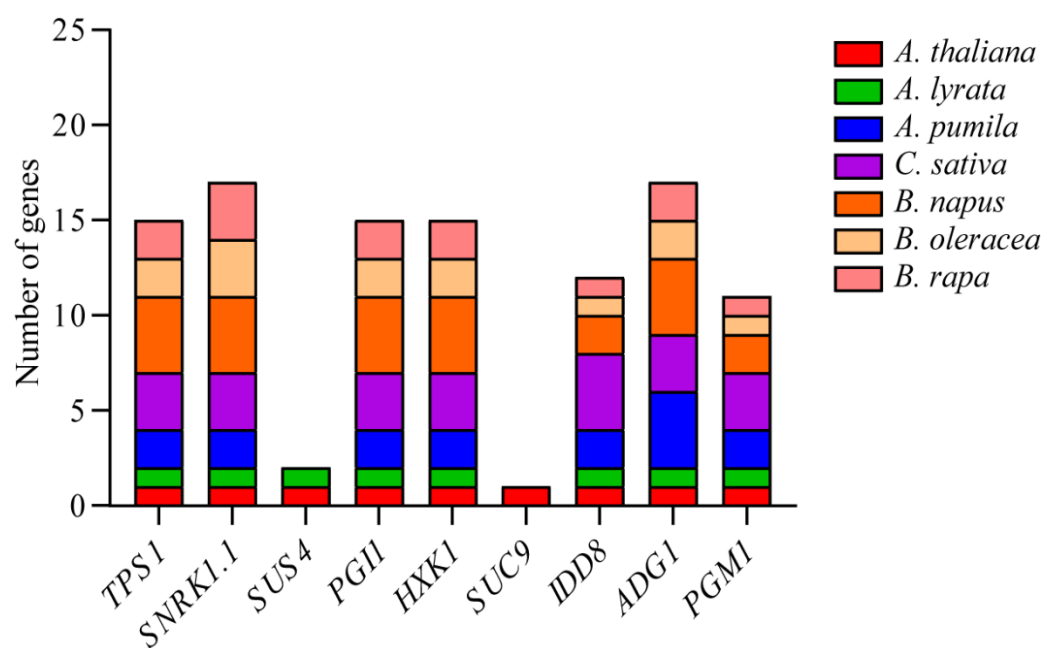

**Figure S1** The number of the identified sugar pathway gene members associated with flowering from seven Brassicaceae species

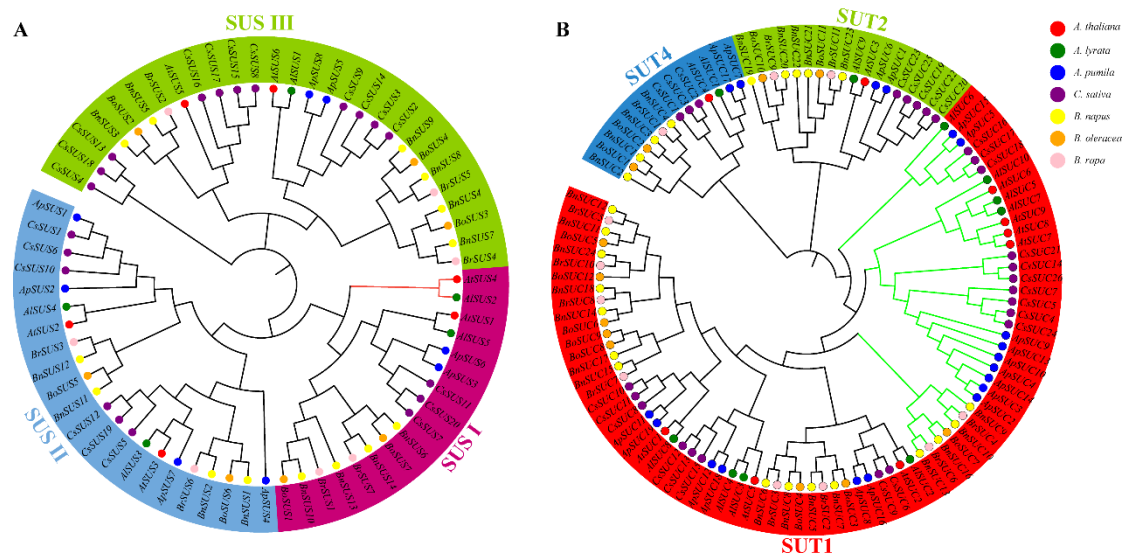

**Figure S2** Phylogenetic trees of SUS and SUC families from seven cruciferous plant. A: Phylogenetic trees of SUS gene family; B: Phylogenetic trees of SUC gene family. The red line indicates the genetic evolution branches of *atsus4* and six other plants, The green line indicates the genetic evolution branches of *AtSUC9* and six other plants, details of the original names corresponding to the names of members of SUS and SUC gene families in table S4 and table S5.

**Table S1** Genes related to flowering transition in the sugar pathway in *Arabidopsis thaliana*

| Abbreviation of gene   | Full name of gene                       | Gene ID   | References                   |
|------------------------|-----------------------------------------|-----------|------------------------------|
| <i>TPS1</i>            | <i>TREHALOSE-6-PHOSPHATE SYNTHASE 1</i> | AT1G78580 | Wahl et al, 2013             |
| <i>AKIN10, SNRK1.1</i> | <i>SNF1 KINASE HOMOLOG 10</i>           | AT3G01090 | Jeong et al, 2015            |
| <i>SUS4</i>            | <i>SUCROSE SYNTHASE 4</i>               | AT3G43190 | Baroja-Fernández et al, 2012 |
| <i>PGI1</i>            | <i>PHOSPHOGLUCOSE ISOMERASE 1</i>       | AT4G24620 | Yu et al, 2000               |
| <i>HXK1, GIN2</i>      | <i>HEXOKINASE 1</i>                     | AT4G29130 | Yang et al, 2013             |
| <i>SUC9</i>            | <i>SUCROSE-PROTON SYMPORTER 9</i>       | AT5G06170 | Sivitz et al., 2007          |
| <i>IDD8, NUC</i>       | <i>INDETERMINATE DOMAIN 8</i>           | AT5G44160 | Seo et al., 2011             |
| <i>ADG1, APS1</i>      | <i>ADP GLUCOSE PYROPHOSPHORYLASE 1</i>  | AT5G48300 | Yu et al, 2000               |
| <i>PGM1</i>            | <i>PHOSPHOGLUCOMUTASE</i>               | AT5G51820 | Yu et al, 2000               |

**Table S2** Names of SUS gene family members in seven Brassicaceae species

| Species                     | Gene           | Gene ID                                 |
|-----------------------------|----------------|-----------------------------------------|
| <i>Arabidopsis thaliana</i> | <i>AtSUS1</i>  | AT5G20830.1                             |
|                             | <i>AtSUS2</i>  | AT5G49190.1                             |
|                             | <i>AtSUS3</i>  | AT4G02280.1                             |
|                             | <i>AtSUS4</i>  | AT3G43190.1                             |
|                             | <i>AtSUS5</i>  | AT5G37180.1                             |
|                             | <i>AtSUS6</i>  | AT1G73370.1                             |
| <i>Arabidopsis lyrata</i>   | <i>AlsUS1</i>  | fgenes1_pm.C_scaffold_2001317           |
|                             | <i>AlsUS2</i>  | fgenes2_kg.5__780__AT3G43190.1          |
|                             | <i>AlsUS3</i>  | fgenes2_kg.6__3476__AT4G02280.1         |
|                             | <i>AlsUS4</i>  | fgenes2_kg.8__796__AT5G49190.1          |
|                             | <i>AlsUS5</i>  | scaffold_602179.1                       |
| <i>Arabidopsis pumila</i>   | <i>ApSUS1</i>  | evm.model.9__7__CONTIGS_16776222.209    |
|                             | <i>ApSUS2</i>  | evm.model.12__9__CONTIGS_14700693.1833  |
|                             | <i>ApSUS3</i>  | evm.model.4__12__CONTIGS_18100624.2820  |
|                             | <i>ApSUS4</i>  | evm.model.4__12__CONTIGS_18100624.738.1 |
|                             | <i>ApSUS5</i>  | evm.model.11__11__CONTIGS_16209776.1538 |
|                             | <i>ApSUS6</i>  | evm.model.6__5__CONTIGS_17268225.1633   |
|                             | <i>ApSUS7</i>  | evm.model.6__5__CONTIGS_17268225.236.1  |
|                             | <i>ApSUS8</i>  | evm.model.14__14__CONTIGS_14340626.772  |
| <i>Camelina sativa</i>      | <i>CsSUS1</i>  | Csa11g078470.1                          |
|                             | <i>CsSUS2</i>  | Csa16g036080.1                          |
|                             | <i>CsSUS3</i>  | Csa16g036080.2                          |
|                             | <i>CsSUS4</i>  | Csa03g006230.1                          |
|                             | <i>CsSUS5</i>  | Csa08g052190.1                          |
|                             | <i>CsSUS6</i>  | Csa18g018540.1                          |
|                             | <i>CsSUS7</i>  | Csa08g014600.1                          |
|                             | <i>CsSUS8</i>  | Csa10g040720.1                          |
|                             | <i>CsSUS9</i>  | Csa09g077930.1                          |
|                             | <i>CsSUS10</i> | Csa02g035280.1                          |
|                             | <i>CsSUS11</i> | Csa20g032780.1                          |
|                             | <i>CsSUS12</i> | Csa02g005510.1                          |
|                             | <i>CsSUS13</i> | Csa20g016510.1                          |
|                             | <i>CsSUS14</i> | Csa07g040560.1                          |
|                             | <i>CsSUS15</i> | Csa11g050910.1                          |
|                             | <i>CsSUS16</i> | Csa12g074560.2                          |
|                             | <i>CsSUS17</i> | Csa12g074560.1                          |
|                             | <i>CsSUS18</i> | Csa20g016510.2                          |
|                             | <i>CsSUS19</i> | Csa13g054950.1                          |
|                             | <i>CsSUS20</i> | Csa13g024710.1                          |
| <i>BnSUS</i>                | <i>BnSUS1</i>  | GSBRNA2T00007838001                     |
|                             | <i>BnSUS2</i>  | GSBRNA2T00018414001                     |
|                             | <i>BnSUS3</i>  | GSBRNA2T00036780001                     |

|                          |                |                     |
|--------------------------|----------------|---------------------|
| <i>Brassica napus</i>    | <i>BnSUS4</i>  | GSBRNA2T00049086001 |
|                          | <i>BnSUS5</i>  | GSBRNA2T00066235001 |
|                          | <i>BnSUS6</i>  | GSBRNA2T00094365001 |
|                          | <i>BnSUS7</i>  | GSBRNA2T00099500001 |
|                          | <i>BnSUS8</i>  | GSBRNA2T00102645001 |
|                          | <i>BnSUS9</i>  | GSBRNA2T00103416001 |
|                          | <i>BnSUS10</i> | GSBRNA2T00140859001 |
|                          | <i>BnSUS11</i> | GSBRNA2T00143079001 |
|                          | <i>BnSUS12</i> | GSBRNA2T00144354001 |
|                          | <i>BnSUS13</i> | GSBRNA2T00148916001 |
|                          | <i>BnSUS14</i> | GSBRNA2T00154198001 |
| <i>Brassica oleracea</i> | <i>BoSUS1</i>  | BolC03g010920.2J    |
|                          | <i>BoSUS2</i>  | BolC06g017370.2J    |
|                          | <i>BoSUS3</i>  | BolC06g032260.2J    |
|                          | <i>BoSUS4</i>  | BolC06g044870.2J    |
|                          | <i>BoSUS5</i>  | BolC07g038200.2J    |
|                          | <i>BoSUS6</i>  | BolC09g001700.2J    |
|                          | <i>BoSUS7</i>  | BolC09g051640.2J    |
| <i>Brassica rapa</i>     | <i>BrSUS1</i>  | BraA03g009830.3C    |
|                          | <i>BrSUS2</i>  | BraA05g015010.3C    |
|                          | <i>BrSUS3</i>  | BraA06g034940.3C    |
|                          | <i>BrSUS4</i>  | BraA07g028740.3C    |
|                          | <i>BrSUS5</i>  | BraA07g037520.3C    |
|                          | <i>BrSUS6</i>  | BraA09g001880.3C    |
|                          | <i>BrSUS7</i>  | BraA10g019840.3C    |

**Table S3** Names of members of the SUC gene family members in seven *Brassicaceae* species

| Species                     | Gene           | Gene ID                               |
|-----------------------------|----------------|---------------------------------------|
| <i>Arabidopsis thaliana</i> | <i>AtSUC1</i>  | AT1G71880                             |
|                             | <i>AtSUC2</i>  | AT1G22710                             |
|                             | <i>AtSUC3</i>  | AT2G02860                             |
|                             | <i>AtSUC4</i>  | AT1G09960                             |
|                             | <i>AtSUC5</i>  | AT1G71890                             |
|                             | <i>AtSUC6</i>  | AT5G43610                             |
|                             | <i>AtSUC7</i>  | AT1G66570                             |
|                             | <i>AtSUC8</i>  | AT2G14670                             |
|                             | <i>AtSUC9</i>  | AT5G06170                             |
| <i>Arabidopsis lyrata</i>   | <i>ALSUC1</i>  | fgenes2_kg.1_1061_AT1G09960.1         |
|                             | <i>ALSUC2</i>  | fgenes2_kg.1_2467_AT1G22710.1         |
|                             | <i>ALSUC3</i>  | fgenes2_kg.2_1445_AT1G71890.1         |
|                             | <i>ALSUC4</i>  | fgenes2_kg.106_1_AT1G71890.1          |
|                             | <i>ALSUC5</i>  | fgenes2_kg.6_554_AT1G66570.1          |
|                             | <i>ALSUC6</i>  | scaffold_603288.1                     |
|                             | <i>ALSUC7</i>  | Al_scaffold_0002_1232                 |
|                             | <i>ALSUC8</i>  | scaffold_202108.1                     |
|                             | <i>ALSUC9</i>  | fgenes2_kg.5_187_AT2G02860.1          |
|                             | <i>ALSUC10</i> | fgenes1_pm.C_scaffold_3002472         |
| <i>Arabidopsis pumila</i>   | <i>ApSUC1</i>  | evm.model.13_8_CONTIGS_14517794.145   |
|                             | <i>ApSUC2</i>  | evm.model.4_12_CONTIGS_18100624.3403  |
|                             | <i>ApSUC3</i>  | evm.model.4_12_CONTIGS_18100624.1444  |
|                             | <i>ApSUC4</i>  | evm.model.4_12_CONTIGS_18100624.1470  |
|                             | <i>ApSUC5</i>  | evm.model.4_12_CONTIGS_18100624.219   |
|                             | <i>ApSUC6</i>  | evm.model.3_5_CONTIGS_18323972.2753   |
|                             | <i>ApSUC7</i>  | evm.model.2_6_CONTIGS_19393823.2691   |
|                             | <i>ApSUC8</i>  | evm.model.2_6_CONTIGS_19393823.1520   |
|                             | <i>ApSUC9</i>  | evm.model.7_7_CONTIGS_17117682.171    |
|                             | <i>ApSUC10</i> | evm.model.7_7_CONTIGS_17117682.2745   |
|                             | <i>ApSUC11</i> | evm.model.11_11_CONTIGS_16209776.1689 |
|                             | <i>ApSUC12</i> | evm.model.11_11_CONTIGS_16209776.1688 |
|                             | <i>ApSUC13</i> | evm.model.6_5_CONTIGS_17268225.2998   |
|                             | <i>ApSUC14</i> | evm.model.6_5_CONTIGS_17268225.3022   |
|                             | <i>ApSUC15</i> | evm.model.6_5_CONTIGS_17268225.747    |
|                             | <i>ApSUC16</i> | evm.model.1_5_CONTIGS_22361435.2083   |
|                             | <i>ApSUC17</i> | evm.model.1_5_CONTIGS_22361435.899    |
|                             | <i>ApSUC18</i> | evm.model.14_14_CONTIGS_14340626.915  |
|                             | <i>ApSUC19</i> | evm.model.14_14_CONTIGS_14340626.916  |
| <i>CsSUC</i>                | <i>CsSUC1</i>  | Csa03g013400.1                        |
|                             | <i>CsSUC2</i>  | Csa14g011470.1                        |
|                             | <i>CsSUC3</i>  | Csa17g013590.1                        |

|                        |                |                     |
|------------------------|----------------|---------------------|
| <i>Camelina sativa</i> | <i>CsSUC4</i>  | Csa04g024680.1      |
|                        | <i>CsSUC5</i>  | Csa04g024680.2      |
|                        | <i>CsSUC6</i>  | Csa17g029640.1      |
|                        | <i>CsSUC7</i>  | Csa09g035840.1      |
|                        | <i>CsSUC8</i>  | Csa09g075220.1      |
|                        | <i>CsSUC9</i>  | Csa14g027910.1      |
|                        | <i>CsSUC10</i> | Csa07g038820.1      |
|                        | <i>CsSUC11</i> | Csa16g034520.1      |
|                        | <i>CsSUC12</i> | Csa07g038830.1      |
|                        | <i>CsSUC13</i> | Csa16g034540.1      |
|                        | <i>CsSUC14</i> | Csa20g008390.1      |
|                        | <i>CsSUC15</i> | Csa09g075230.1      |
|                        | <i>CsSUC16</i> | Csa02g028390.1      |
|                        | <i>CsSUC17</i> | Csa13g043590.1      |
|                        | <i>CsSUC18</i> | Csa08g037440.1      |
|                        | <i>CsSUC19</i> | Csa09g005070.1      |
|                        | <i>CsSUC20</i> | Csa04g008350.2      |
|                        | <i>CsSUC21</i> | Csa08g058350.1      |
|                        | <i>CsSUC22</i> | Csa04g008350.1      |
|                        | <i>CsSUC23</i> | Csa06g002850.1      |
|                        | <i>CsSUC24</i> | Csa06g018450.1      |
|                        | <i>CsSUC25</i> | Csa09g005070.2      |
|                        | <i>CsSUC26</i> | Csa20g008380.1      |
| <i>Brassica napus</i>  | <i>BnSUC1</i>  | GSBRNA2T00037540001 |
|                        | <i>BnSUC2</i>  | GSBRNA2T00156127001 |
|                        | <i>BnSUC3</i>  | GSBRNA2T00019276001 |
|                        | <i>BnSUC4</i>  | GSBRNA2T00011511001 |
|                        | <i>BnSUC5</i>  | GSBRNA2T00033135001 |
|                        | <i>BnSUC6</i>  | GSBRNA2T00015756001 |
|                        | <i>BnSUC7</i>  | GSBRNA2T00061853001 |
|                        | <i>BnSUC8</i>  | GSBRNA2T00119488001 |
|                        | <i>BnSUC9</i>  | GSBRNA2T00134421001 |
|                        | <i>BnSUC10</i> | GSBRNA2T00049405001 |
|                        | <i>BnSUC11</i> | GSBRNA2T00103236001 |
|                        | <i>BnSUC12</i> | GSBRNA2T00102508001 |
|                        | <i>BnSUC13</i> | GSBRNA2T00029602001 |
|                        | <i>BnSUC14</i> | GSBRNA2T00137296001 |
|                        | <i>BnSUC15</i> | GSBRNA2T00099581001 |
|                        | <i>BnSUC16</i> | GSBRNA2T00107013001 |
|                        | <i>BnSUC17</i> | GSBRNA2T00062437001 |
|                        | <i>BnSUC18</i> | GSBRNA2T00116464001 |
|                        | <i>BnSUC19</i> | GSBRNA2T00073348001 |
|                        | <i>BnSUC20</i> | GSBRNA2T00030810001 |
|                        | <i>BnSUC21</i> | GSBRNA2T00115350001 |

|                          |                |                     |
|--------------------------|----------------|---------------------|
|                          | <i>BnSUC22</i> | GSBRNA2T00062975001 |
|                          | <i>BnSUC23</i> | GSBRNA2T00081619001 |
|                          | <i>BnSUC24</i> | GSBRNA2T00081760001 |
| <i>Brassica oleracea</i> | <i>BoSUC1</i>  | BolC05g007810.2J    |
|                          | <i>BoSUC2</i>  | BolC08g056300.2J    |
|                          | <i>BoSUC3</i>  | BolC07g020620.2J    |
|                          | <i>BoSUC4</i>  | BolC05g021040.2J    |
|                          | <i>BoSUC5</i>  | BolC06g043310.2J    |
|                          | <i>BoSUC6</i>  | BolC02g028540.2J    |
|                          | <i>BoSUC7</i>  | BolC09g065780.2J    |
|                          | <i>BoSUC8</i>  | BolC09g022600.2J    |
|                          | <i>BoSUC9</i>  | BolC06g033450.2J    |
|                          | <i>BoSUC10</i> | BolC02g050720.2J    |
|                          | <i>BoSUC11</i> | BolC07g032500.2J    |
|                          | <i>BoSUC12</i> | BolC07g057680.2J    |
| <i>Brassica rapa</i>     | <i>BrSUC1</i>  | BraA09g062110.3C    |
|                          | <i>BrSUC2</i>  | BraA07g014520.3C    |
|                          | <i>BrSUC3</i>  | BraA09g040330.3C    |
|                          | <i>BrSUC4</i>  | BraA03g002390.3C    |
|                          | <i>BrSUC5</i>  | BraA07g036350.3C    |
|                          | <i>BrSUC6</i>  | BraA10g028880.3C    |
|                          | <i>BrSUC7</i>  | BraA07g029350.3C    |
|                          | <i>BrSUC8</i>  | BraA02g020540.3C    |
|                          | <i>BrSUC9</i>  | BraA02g035840.3C    |
|                          | <i>BrSUC10</i> | BraA03g058820.3C    |
|                          | <i>BrSUC11</i> | BraA06g039570.3C    |



**Table S4** Accession numbers of RNA-Seq data of *Arabidopsis pumila* nine different tissues

| Accession number | Library ID | Tissues      |
|------------------|------------|--------------|
| SRR14470720      | EM         | Embryo       |
| SRR14470722      | YR         | Young root   |
| SRR14470717      | MR         | Mature root  |
| SRR14470714      | RL         | Rosette leaf |
| SRR14470712      | CL         | Cauline leaf |
| SRR14470713      | BU         | Bud          |
| SRR14470719      | FL         | Flower       |
| SRR14470724      | SL         | Silique      |
| SRR14470710      | SE         | Seed         |

**Table S5** Primer sequences used in qPCR assay

| Primer     | Primer sequence (5'→3') |
|------------|-------------------------|
| ApADG1-1-F | GACATCTTTCCCGTGCGTAT    |
| ApADG1-1-R | AGTCTCCCTATGCGCTTGAA    |
| ApADG1-2-F | AAGGCCATGAAGGTTGACAC    |
| ApADG1-2-R | CTTCGCTTCCGAAGTCATTC    |
| ApADG1-4-F | GCTGATGCTGTGAGGCAGTA    |
| ApADG1-4-R | AGGAAGAGCAGCAACCGTAA    |
| ApGADPH-F  | CTCCCATGTTTGTTGTTGGTGTC |
| ApGADPH-R  | CTCCACCTCTCCAGTCCTTCATT |

**Table S6** Information on the identified sugar pathway gene members identified to be associated with flowering from seven Brassicaceae species

| Species                     | Gene               | Gene ID                              | Chromosome No. | Amino acid No. | Molecular weight (kDa) | PI   | Subcellular localization         |
|-----------------------------|--------------------|--------------------------------------|----------------|----------------|------------------------|------|----------------------------------|
| <i>Arabidopsis thaliana</i> | <i>AtTPS1</i>      | AT1G78580                            | Chr1           | 942            | 105.98                 | 6.70 | Cell wall and Vacuole            |
|                             | <i>AtSNRK1.1</i>   | AT3G01090                            | Chr3           | 535            | 61.18                  | 8.44 | Nucleus                          |
|                             | <i>AtSUS4</i>      | AT3G43190                            | Chr3           | 808            | 93.00                  | 6.12 | Chloroplast                      |
|                             | <i>AtPGI1</i>      | AT4G24620                            | Chr4           | 613            | 67.05                  | 5.47 | Cytoplasm                        |
|                             | <i>AtH XK1</i>     | AT4G29130                            | Chr4           | 496            | 53.71                  | 5.76 | Chloroplast and Mitochondrion    |
|                             | <i>AtSUC9</i>      | AT5G06170                            | Chr5           | 491            | 52.58                  | 9.13 | Cell membrane                    |
|                             | <i>AtIDD8</i>      | AT5G44160                            | Chr5           | 466            | 51.19                  | 8.36 | Nucleus                          |
|                             | <i>AtADG1</i>      | AT5G48300                            | Chr5           | 520            | 56.65                  | 6.13 | Chloroplast                      |
|                             | <i>AtPGM1</i>      | AT5G51820                            | Chr5           | 623            | 67.99                  | 5.48 | Chloroplast                      |
| <i>Arabidopsis lyrata</i>   | <i>AtTPS1</i>      | fgenes2_kg.2_2152_AT1G78580.1        | Chr2           | 955            | 107.40                 | 6.92 | Cell wall; Cytoplasm and Vacuole |
|                             | <i>AtSNRK1.1</i>   | fgenes1_pm.C_scaffold_3000097        | Chr3           | 509            | 58.05                  | 8.01 | Nucleus                          |
|                             | <i>AtSUS4</i>      | fgenes2_kg.5_780_AT3G43190.1         | Chr5           | 808            | 92.64                  | 6.02 | Chloroplast                      |
|                             | <i>AtPGI1</i>      | fgenes2_kg.7_1814_AT4G24620.1        | Chr7           | 613            | 67.13                  | 5.42 | Cytoplasm                        |
|                             | <i>AtH XK1</i>     | scaffold_701340.1                    | Chr7           | 496            | 53.74                  | 5.66 | Chloroplast and Mitochondrion    |
|                             | <i>AtIDD8</i>      | scaffold_800604.1                    | Chr8           | 464            | 51.17                  | 8.61 | Nucleus                          |
|                             | <i>AtADG1</i>      | fgenes2_kg.8_698_AT5G48300.1         | Chr8           | 521            | 57.06                  | 6.30 | Chloroplast                      |
|                             | <i>AtPGM1</i>      | fgenes2_kg.8_1063_AT5G51820.1        | Chr8           | 618            | 67.31                  | 5.32 | Chloroplast                      |
| <i>Arabidopsis pumila</i>   | <i>ApTPS1-1</i>    | evm.model.14_14_CONTIGS_14340626.258 | Chr14          | 944            | 106.24                 | 6.80 | Cell wall and Vacuole            |
|                             | <i>ApTPS1-2</i>    | evm.model.11_11_CONTIGS_16209776.830 | Chr9           | 947            | 106.59                 | 6.81 | Cell wall; Cytoplasm and Vacuole |
|                             | <i>ApSNRK1.1-1</i> | evm.model.5_10_CONTIGS_17087769.3140 | Chr7           | 397            | 45.83                  | 6.29 | Nucleus                          |
|                             | <i>ApSNRK1.1-2</i> | evm.model.8_3_CONTIGS_16920646.3113  | Chr8           | 392            | 45.19                  | 5.93 | Nucleus                          |
|                             | <i>ApPGI1-1</i>    | evm.model.0_8_CONTIGS_29314649.4500  | Chr5           | 613            | 67.29                  | 5.43 | Cytoplasm                        |
|                             | <i>ApPGI1-2</i>    | evm.model.0_8_CONTIGS_29314649.1181  | Chr11          | 614            | 67.46                  | 5.49 | Cytoplasm                        |
|                             | <i>ApH XK1-1</i>   | evm.model.0_8_CONTIGS_29314649.4954  | Chr5           | 498            | 53.89                  | 5.71 | Chloroplast and Mitochondrion    |

|                        |                    |                                       |       |      |        |      |                                  |
|------------------------|--------------------|---------------------------------------|-------|------|--------|------|----------------------------------|
| <i>Camelina sativa</i> | <i>ApH XK1-2</i>   | evm.model.0__8_CONTIGS_29314649.1623  | Chr11 | 498  | 54.03  | 5.80 | Chloroplast and Mitochondrion    |
|                        | <i>ApIDD8-1</i>    | evm.model.12__9_CONTIGS_14700693.2307 | Chr15 | 465  | 50.76  | 8.46 | Nucleus                          |
|                        | <i>ApIDD8-2</i>    | evm.model.9__7_CONTIGS_16776222.2421  | Chr10 | 460  | 50.27  | 8.44 | Nucleus                          |
|                        | <i>ApADG1-1</i>    | evm.model.12__9_CONTIGS_14700693.1936 | Chr15 | 510  | 55.71  | 5.92 | Chloroplast                      |
|                        | <i>ApADG1-2</i>    | evm.model.9__7_CONTIGS_16776222.114   | Chr10 | 511  | 55.97  | 5.80 | Chloroplast                      |
|                        | <i>ApADG1-3</i>    | evm.model.5__10_CONTIGS_17087769.582  | Chr7  | 518  | 56.76  | 6.30 | Chloroplast                      |
|                        | <i>ApADG1-4</i>    | evm.model.8__3_CONTIGS_16920646.847   | Chr8  | 518  | 56.79  | 6.11 | Chloroplast                      |
|                        | <i>ApPGM1-1</i>    | evm.model.9__7_CONTIGS_16776222.478   | Chr10 | 626  | 68.17  | 5.40 | Chloroplast                      |
|                        | <i>ApPGM1-2</i>    | evm.model.12__9_CONTIGS_14700693.1587 | Chr15 | 626  | 68.18  | 5.55 | Chloroplast                      |
|                        | <i>CsTPS1-1</i>    | Csa09g092680.1                        | Chr9  | 1038 | 117.18 | 6.95 | Vacuole                          |
|                        | <i>CsTPS1-2</i>    | Csa07g057580.1                        | Chr7  | 1010 | 113.44 | 6.51 | Cell wall; Cytoplasm and Vacuole |
|                        | <i>CsTPS1-3</i>    | Csa16g048140.1                        | Chr16 | 1095 | 122.76 | 8.07 | Cell wall and Vacuole            |
|                        | <i>CsSNRK1.1-1</i> | Csa19g002550.1                        | Chr19 | 509  | 57.98  | 8.01 | Nucleus                          |
|                        | <i>CsSNRK1.1-2</i> | Csa15g001490.1                        | Chr15 | 509  | 57.97  | 8.01 | Nucleus                          |
|                        | <i>CsSNRK1.1-3</i> | Csa01g001460.1                        | Chr1  | 509  | 58.01  | 8.01 | Nucleus                          |
|                        | <i>CsPGI1-1</i>    | Csa12g029700.1                        | Chr12 | 617  | 67.62  | 5.41 | Cytoplasm                        |
|                        | <i>CsPGI1-2</i>    | Csa10g018420.1                        | Chr10 | 615  | 67.32  | 5.30 | Cytoplasm                        |
|                        | <i>CsPGI1-3</i>    | Csa11g020110.1                        | Chr11 | 616  | 67.43  | 5.37 | Cytoplasm                        |
| <i>Camelina sativa</i> | <i>CsH XK1-1</i>   | Csa12g020330.1                        | Chr12 | 496  | 53.65  | 5.86 | Chloroplast and Mitochondrion    |
|                        | <i>CsH XK1-2</i>   | Csa10g013440.1                        | Chr10 | 499  | 54.02  | 5.77 | Chloroplast and Mitochondrion    |
|                        | <i>CsH XK1-3</i>   | Csa11g014380.1                        | Chr11 | 499  | 54.05  | 5.77 | Chloroplast and Mitochondrion    |
|                        | <i>CsIDD8-1</i>    | Csa20g071190.1                        | Chr20 | 464  | 50.68  | 8.58 | Nucleus                          |
|                        | <i>CsIDD8-2</i>    | Csa18g009620.1                        | Chr18 | 468  | 51.27  | 8.45 | Nucleus                          |
|                        | <i>CsIDD8-3</i>    | Csa20g071190.2                        | Chr20 | 453  | 49.38  | 8.52 | Nucleus                          |
|                        | <i>CsIDD8-4</i>    | Csa11g070530.1                        | Chr11 | 391  | 42.20  | 6.38 | Nucleus                          |
|                        | <i>CsADG1-1</i>    | Csa18g014380.1                        | Chr18 | 518  | 56.65  | 5.87 | Chloroplast                      |

|                       |                    |                     |        |     |        |      |                                  |
|-----------------------|--------------------|---------------------|--------|-----|--------|------|----------------------------------|
|                       | <i>CsADG1-2</i>    | Csa11g074430.1      | Chr11  | 520 | 56.83  | 5.87 | Chloroplast                      |
|                       | <i>CsADG1-3</i>    | Csa20g041200.1      | Chr20  | 523 | 57.22  | 5.87 | Chloroplast                      |
|                       | <i>CsPGM1-1</i>    | Csa18g022680.1      | Chr18  | 619 | 67.24  | 5.38 | Chloroplast                      |
|                       | <i>CsPGM1-2</i>    | Csa02g044730.1      | Chr2   | 617 | 66.90  | 5.09 | Chloroplast                      |
|                       | <i>CsPGM1-3</i>    | Csa11g083410.1      | Chr11  | 617 | 66.87  | 5.13 | Chloroplast                      |
| <i>Brassica napus</i> | <i>BnTPS1-1</i>    | GSBRNA2T00148002001 | ChrC06 | 951 | 107.08 | 6.63 | Cell wall; Cytoplasm and Vacuole |
|                       | <i>BnTPS1-2</i>    | GSBRNA2T00146430001 | ChrA07 | 950 | 106.94 | 6.63 | Cell wall; Cytoplasm and Vacuole |
|                       | <i>BnTPS1-3</i>    | GSBRNA2T00084348001 | ChrC02 | 932 | 104.80 | 6.74 | Cell wall; Cytoplasm and Vacuole |
|                       | <i>BnTPS1-4</i>    | GSBRNA2T00036543001 | ChrA02 | 774 | 87.35  | 6.63 | Cytoplasm and Vacuole            |
|                       | <i>BnSNRK1.1-1</i> | GSBRNA2T00017357001 | ChrCnn | 511 | 58.04  | 8.01 | Nucleus                          |
|                       | <i>BnSNRK1.1-2</i> | GSBRNA2T00057213001 | ChrA01 | 511 | 58.08  | 8.01 | Nucleus                          |
|                       | <i>BnSNRK1.1-3</i> | GSBRNA2T00064166001 | ChrA05 | 506 | 57.63  | 8.03 | Nucleus                          |
|                       | <i>BnSNRK1.1-4</i> | GSBRNA2T00076301001 | ChrC05 | 506 | 57.67  | 8.03 | Nucleus                          |
|                       | <i>BnPGI1-1</i>    | GSBRNA2T00116085001 | ChrC01 | 615 | 66.98  | 5.23 | Cytoplasm                        |
|                       | <i>BnPGI1-2</i>    | GSBRNA2T00048977001 | ChrA03 | 613 | 66.84  | 5.38 | Cytoplasm                        |
|                       | <i>BnPGI1-3</i>    | GSBRNA2T00056331001 | ChrA01 | 616 | 67.02  | 5.22 | Cytoplasm                        |
|                       | <i>BnPGI1-4</i>    | GSBRNA2T00154458001 | ChrC07 | 614 | 66.88  | 5.23 | Cytoplasm                        |
|                       | <i>BnH XK1-1</i>   | GSBRNA2T00059441001 | ChrA07 | 500 | 54.03  | 5.49 | Chloroplast and Mitochondrion    |
|                       | <i>BnH XK1-2</i>   | GSBRNA2T00138056001 | ChrC07 | 499 | 53.93  | 5.63 | Chloroplast and Mitochondrion    |
|                       | <i>BnH XK1-3</i>   | GSBRNA2T00091626001 | ChrA09 | 499 | 53.90  | 5.40 | Chloroplast and Mitochondrion    |
|                       | <i>BnH XK1-4</i>   | GSBRNA2T00115923001 | ChrC09 | 499 | 54.04  | 5.27 | Chloroplast and Mitochondrion    |
|                       | <i>BnIDD8-1</i>    | GSBRNA2T00018774001 | ChrA06 | 464 | 50.61  | 8.60 | Nucleus                          |
|                       | <i>BnIDD8-2</i>    | GSBRNA2T00158200001 | ChrC07 | 464 | 50.63  | 8.69 | Nucleus                          |
|                       | <i>BnADG1-1</i>    | GSBRNA2T00076549001 | ChrCnn | 511 | 56.14  | 6.30 | Chloroplast                      |
|                       | <i>BnADG1-2</i>    | GSBRNA2T00144434001 | ChrA06 | 513 | 56.12  | 6.73 | Chloroplast                      |
|                       | <i>BnADG1-3</i>    | GSBRNA2T00110776001 | ChrCnn | 520 | 57.07  | 5.99 | Chloroplast                      |

|                          |                    |                     |        |     |        |      |                                  |
|--------------------------|--------------------|---------------------|--------|-----|--------|------|----------------------------------|
|                          | <i>BnADG1-4</i>    | GSBRNA2T00038740001 | ChrA07 | 520 | 57.04  | 5.86 | Chloroplast                      |
|                          | <i>BnPGM1-1</i>    | GSBRNA2T00110218001 | ChrA10 | 635 | 69.12  | 5.77 | Chloroplast                      |
|                          | <i>BnPGM1-2</i>    | GSBRNA2T00042494001 | ChrCnn | 629 | 68.52  | 5.48 | Chloroplast                      |
| <i>Brassica oleracea</i> | <i>BoTPS1-1</i>    | BolC06g049480.2J    | Chr6   | 951 | 107.08 | 6.63 | Cell wall; Cytoplasm and Vacuole |
|                          | <i>BoTPS1-2</i>    | BolC02g034630.2J    | Chr2   | 947 | 106.42 | 6.87 | Cell wall; Cytoplasm and Vacuole |
|                          | <i>BoSNRK1.1-1</i> | BolC01g057210.2J    | Chr1   | 511 | 58.04  | 8.01 | Nucleus                          |
|                          | <i>BoSNRK1.1-2</i> | BolC05g062460.2J    | Chr5   | 513 | 58.35  | 8.00 | Nucleus                          |
|                          | <i>BoSNRK1.1-3</i> | BolC03g035940.2J    | Chr3   | 528 | 59.97  | 8.79 | Nucleus                          |
|                          | <i>BoPGII-1</i>    | BolC01g019030.2J    | Chr1   | 592 | 64.42  | 5.05 | Cytoplasm                        |
|                          | <i>BoPGII-2</i>    | BolC01g019040.2J    | Chr1   | 518 | 56.52  | 5.43 | Cytoplasm                        |
|                          | <i>BoH XK1-1</i>   | BolC07g001520.2J    | Chr7   | 499 | 53.92  | 5.63 | Chloroplast and Mitochondrion    |
|                          | <i>BoH XK1-2</i>   | BolC09g014060.2J    | Chr9   | 499 | 54.04  | 5.27 | Chloroplast and Mitochondrion    |
|                          | <i>BoIDD8</i>      | BolC07g025980.2J    | Chr7   | 464 | 50.60  | 8.69 | Nucleus                          |
|                          | <i>BoADG1-1</i>    | BolC07g037440.2J    | Chr7   | 511 | 56.07  | 6.14 | Chloroplast                      |
|                          | <i>BoADG1-2</i>    | BolC07g010610.2J    | Chr7   | 627 | 69.16  | 6.51 | Chloroplast                      |
|                          | <i>BoPGM1</i>      | BolC09g038330.2J    | Chr9   | 629 | 68.52  | 5.48 | Chloroplast                      |
| <i>Brassica rapa</i>     | <i>BrTPS1-1</i>    | BraA07g041670.3C    | Chr9   | 975 | 109.93 | 6.65 | Vacuole                          |
|                          | <i>BrTPS1-2</i>    | BraA02g024760.3C    | Chr2   | 921 | 103.67 | 6.75 | Cell wall and Vacuole            |
|                          | <i>BrSNRK1.1-1</i> | BraA01g044590.3C    | Chr1   | 511 | 58.06  | 8.01 | Nucleus                          |
|                          | <i>BrSNRK1.1-2</i> | BraA05g040920.3C    | Chr5   | 506 | 57.63  | 8.03 | Nucleus                          |
|                          | <i>BrSNRK1.1-3</i> | BraA03g030660.3C    | Chr3   | 523 | 59.642 | 8.86 | Nucleus                          |
|                          | <i>BrPGII-1</i>    | BraA01g015390.3C    | Chr1   | 616 | 67.08  | 5.32 | Cytoplasm                        |
|                          | <i>BrPGII-2</i>    | BraA03g052000.3C    | Chr3   | 613 | 66.79  | 5.33 | Cytoplasm                        |
|                          | <i>BrH XK1-1</i>   | BraA07g000960.3C    | Chr7   | 500 | 54.06  | 5.42 | Chloroplast and Mitochondrion    |
|                          | <i>BrH XK1-2</i>   | BraA09g012100.3C    | Chr9   | 499 | 53.93  | 5.40 | Chloroplast and Mitochondrion    |
|                          | <i>BrIDD8</i>      | BraA06g043270.3C    | Chr6   | 453 | 49.34  | 8.76 | Nucleus                          |

|                 |                  |       |     |       |      |             |
|-----------------|------------------|-------|-----|-------|------|-------------|
| <i>BrADG1-1</i> | BraA07g007620.3C | Chr7  | 520 | 57.04 | 5.86 | Chloroplast |
| <i>BrADG1-2</i> | BraA06g035670.3C | Chr6  | 513 | 56.32 | 7.09 | Chloroplast |
| <i>BrPGM1</i>   | BraA10g010420.3C | Chr10 | 670 | 73.34 | 5.80 | Chloroplast |

---

**Table S7** The non-synonymous (*Ka*) and synonymous (*Ks*) of orthologous gene pairs of the sugar pathway members in seven Brassicaceae spp.

| Collinear gene pair                   | Protein sequence similarity (%) | <i>Ka</i>   | <i>Ks</i>   | <i>Ka/Ks</i> | Evolutionary selection |
|---------------------------------------|---------------------------------|-------------|-------------|--------------|------------------------|
| <i>AtTPS1</i> / <i>AITPS1</i>         | 96.957                          | 0.008360514 | 0.163302835 | 0.051196379  | Purification selection |
| <i>AtSNRK1.1</i> / <i>AlSNRK1.1</i>   | 98.242                          | 0.005539404 | 0.089613416 | 0.061814456  | Purification selection |
| <i>AtSUS4</i> / <i>AlSUS4</i>         | 96.287                          | 0.017094757 | 0.214461180 | 0.079710263  | Purification selection |
| <i>AtPGI1</i> / <i>AlPGI1</i>         | 98.695                          | 0.005781072 | 0.104807563 | 0.055158917  | Purification selection |
| <i>AtH XK1</i> / <i>AlH XK1</i>       | 98.185                          | 0.008011946 | 0.091830529 | 0.087247081  | Purification selection |
| <i>AtIDD8</i> / <i>AlIDD8</i>         | 94.433                          | 0.019881252 | 0.164226135 | 0.121060223  | Purification selection |
| <i>AtADG1</i> / <i>AlADG1</i>         | 95.202                          | 0.023799080 | 0.19262735  | 0.123549851  | Purification selection |
| <i>AtPGM1</i> / <i>AlPGM1</i>         | 94.409                          | 0.016342081 | 0.160534265 | 0.101798085  | Purification selection |
| <i>AtTPS1</i> / <i>ApTPS1-1</i>       | 98.095                          | 0.008949432 | 0.221002578 | 0.040494696  | Purification selection |
| <i>AtTPS1</i> / <i>ApTPS1-2</i>       | 97.996                          | 0.007428389 | 0.201750621 | 0.036819659  | Purification selection |
| <i>AtSNRK1.1</i> / <i>ApSNRK1.1-1</i> | 97.906                          | 0.045932229 | 0.190464354 | 0.241159190  | Purification selection |
| <i>AtSNRK1.1</i> / <i>ApSNRK1.1-2</i> | 96.859                          | 0.023642620 | 0.139939467 | 0.168948905  | Purification selection |
| <i>AtPGI1</i> / <i>ApPGI1-1</i>       | 96.580                          | 0.017070955 | 0.206122272 | 0.082819555  | Purification selection |
| <i>AtPGI1</i> / <i>ApPGI1-2</i>       | 96.585                          | 0.016351402 | 0.185184129 | 0.088298072  | Purification selection |
| <i>AtH XK1</i> / <i>ApH XK1-1</i>     | 96.192                          | 0.016110405 | 0.241283866 | 0.066769506  | Purification selection |
| <i>AtH XK1</i> / <i>ApH XK1-2</i>     | 95.795                          | 0.017912636 | 0.204157582 | 0.087739264  | Purification selection |
| <i>AtIDD8</i> / <i>ApIDD8-1</i>       | 89.496                          | 0.031409280 | 0.311738291 | 0.100755284  | Purification selection |
| <i>AtIDD8</i> / <i>ApIDD8-2</i>       | 89.006                          | 0.035545868 | 0.343426052 | 0.103503702  | Purification selection |
| <i>AtADG1</i> / <i>ApADG1-1</i>       | 91.939                          | 0.035091555 | 0.343030784 | 0.102298560  | Purification selection |
| <i>AtADG1</i> / <i>ApADG1-2</i>       | 91.747                          | 0.038032815 | 0.344430181 | 0.110422424  | Purification selection |
| <i>AtPGM1</i> / <i>ApPGM1-1</i>       | 95.056                          | 0.022179474 | 0.255276137 | 0.086884243  | Purification selection |
| <i>AtPGM1</i> / <i>ApPGM1-2</i>       | 95.056                          | 0.021471555 | 0.261003181 | 0.082265490  | Purification selection |
| <i>AtTPS1</i> / <i>CsTPS1-1</i>       | 91.584                          | 0.008492083 | 0.256483393 | 0.033109681  | Purification selection |
| <i>AtTPS1</i> / <i>CsTPS1-2</i>       | 90.981                          | 0.010174782 | 0.252744167 | 0.040257236  | Purification selection |



|                                |        |             |             |             |                        |
|--------------------------------|--------|-------------|-------------|-------------|------------------------|
| <i>AtTPS1 / CsTPS1-3</i>       | 90.616 | 0.010209674 | 0.249271378 | 0.040958066 | Purification selection |
| <i>AtSNRK1.1 / CsSNRK1.1-1</i> | 98.441 | 0.005407608 | 0.211016385 | 0.025626485 | Purification selection |
| <i>AtSNRK1.1 / CsSNRK1.1-2</i> | 98.441 | 0.006264125 | 0.214912300 | 0.029147353 | Purification selection |
| <i>AtSNRK1.1 / CsSNRK1.1-3</i> | 98.428 | 0.007122392 | 0.234105159 | 0.030423898 | Purification selection |
| <i>AtPGII / CsPGII-1</i>       | 95.146 | 0.020770138 | 0.266728913 | 0.077869840 | Purification selection |
| <i>AtPGII / CsPGII-2</i>       | 94.805 | 0.023009900 | 0.281944598 | 0.081611424 | Purification selection |
| <i>AtPGII / CsPGII-3</i>       | 95.138 | 0.020778972 | 0.272702072 | 0.076196604 | Purification selection |
| <i>AtH XK1 / CsH XK1-1</i>     | 95.372 | 0.024771448 | 0.298468499 | 0.082995183 | Purification selection |
| <i>AtH XK1 / CsH XK1-2</i>     | 95.200 | 0.021124992 | 0.277648587 | 0.076085358 | Purification selection |
| <i>AtH XK1 / CsH XK1-3</i>     | 95.000 | 0.022017456 | 0.278585585 | 0.079033007 | Purification selection |
| <i>AtIDD8 / CsIDD8-1</i>       | 89.316 | 0.045943437 | 0.312769448 | 0.146892342 | Purification selection |
| <i>AtIDD8 / CsIDD8-2</i>       | 89.362 | 0.045261267 | 0.356748483 | 0.126871645 | Purification selection |
| <i>AtADG1 / CsADG1-1</i>       | 92.352 | 0.034242133 | 0.270302224 | 0.126680916 | Purification selection |
| <i>AtADG1 / CsADG1-2</i>       | 91.238 | 0.038266396 | 0.287413777 | 0.133140439 | Purification selection |
| <i>AtADG1 / CsADG1-3</i>       | 91.082 | 0.041795361 | 0.309945327 | 0.134847529 | Purification selection |
| <i>AtPGM1 / CsPGM1-1</i>       | 93.770 | 0.026675886 | 0.261633355 | 0.101959043 | Purification selection |
| <i>AtPGM1 / CsPGM1-2</i>       | 94.089 | 0.023837326 | 0.258881933 | 0.092077982 | Purification selection |
| <i>AtPGM1 / CsPGM1-3</i>       | 93.610 | 0.026051823 | 0.271503172 | 0.095954029 | Purification selection |
| <i>AtTPS1 / BnTPS1-1</i>       | 94.087 | 0.029508645 | 0.511502962 | 0.057690076 | Purification selection |
| <i>AtTPS1 / BnTPS1-2</i>       | 93.559 | 0.025706022 | 0.475556168 | 0.054054649 | Purification selection |
| <i>AtTPS1 / BnTPS1-3</i>       | 92.986 | 0.022313588 | 0.402708913 | 0.055408726 | Purification selection |
| <i>AtTPS1 / BnTPS1-4</i>       | 90.262 | 0.020975365 | 0.413475221 | 0.050729437 | Purification selection |
| <i>AtSNRK1.1 / BnSNRK1.1-1</i> | 96.296 | 0.021060047 | 0.465442982 | 0.045247319 | Purification selection |
| <i>AtSNRK1.1 / BnSNRK1.1-2</i> | 96.296 | 0.020990410 | 0.465577393 | 0.045084685 | Purification selection |
| <i>AtSNRK1.1 / BnSNRK1.1-3</i> | 94.553 | 0.022495881 | 0.429194243 | 0.052414220 | Purification selection |
| <i>AtSNRK1.1 / BnSNRK1.1-4</i> | 94.163 | 0.023380402 | 0.419115704 | 0.055785079 | Purification selection |

|                                |        |             |             |             |                        |
|--------------------------------|--------|-------------|-------------|-------------|------------------------|
| <i>AtPGII / BnPGII-1</i>       | 88.835 | 0.054501272 | 0.409567118 | 0.133070429 | Purification selection |
| <i>AtPGII / BnPGII-2</i>       | 90.610 | 0.037963946 | 0.47951917  | 0.079170862 | Purification selection |
| <i>AtPGII / BnPGII-3</i>       | 88.817 | 0.055939718 | 0.437028046 | 0.128000294 | Purification selection |
| <i>AtPGII / BnPGII-4</i>       | 89.786 | 0.045152666 | 0.464090537 | 0.097292796 | Purification selection |
| <i>AtH XK1 / BnH XK1-1</i>     | 88.889 | 0.063668035 | 0.775598690 | 0.082088889 | Purification selection |
| <i>AtH XK1 / BnH XK1-2</i>     | 89.113 | 0.063170901 | 0.734716061 | 0.085980019 | Purification selection |
| <i>AtH XK1 / BnH XK1-3</i>     | 89.006 | 0.059354730 | 0.789800307 | 0.075151566 | Purification selection |
| <i>AtH XK1 / BnH XK1-4</i>     | 89.006 | 0.061272677 | 0.806339797 | 0.075988656 | Purification selection |
| <i>AtIDD8 / BnIDD8-1</i>       | 83.898 | 0.069187549 | 0.535738564 | 0.129144239 | Purification selection |
| <i>AtIDD8 / BnIDD8-2</i>       | 83.263 | 0.068909307 | 0.516395270 | 0.133442947 | Purification selection |
| <i>AtADG1 / BnADG1-2</i>       | 90.286 | 0.040269220 | 0.565200964 | 0.071247614 | Purification selection |
| <i>AtPGM1 / BnPGM1-1</i>       | 91.209 | 0.032680215 | 0.270049062 | 0.121015842 | Purification selection |
| <i>AtTPS1 / BoTPS1-1</i>       | 94.087 | 0.029508645 | 0.511502962 | 0.057690076 | Purification selection |
| <i>AtTPS1 / BoTPS1-2</i>       | 94.474 | 0.022429819 | 0.389099133 | 0.057645513 | Purification selection |
| <i>AtSNRK1.1 / BoSNRK1.1-1</i> | 96.296 | 0.021060047 | 0.465442982 | 0.045247319 | Purification selection |
| <i>AtSNRK1.1 / BoSNRK1.1-2</i> | 92.898 | 0.023387196 | 0.418580664 | 0.055872613 | Purification selection |
| <i>AtSNRK1.1 / BoSNRK1.1-3</i> | 87.354 | 0.062715840 | 0.342335817 | 0.183199760 | Purification selection |
| <i>AtPGII / BoPGII-1</i>       | 84.653 | 0.060747164 | 0.396151692 | 0.153343190 | Purification selection |
| <i>AtH XK1 / BoH XK1-1</i>     | 89.113 | 0.062197437 | 0.757847384 | 0.082071191 | Purification selection |
| <i>AtH XK1 / BoH XK1-2</i>     | 89.006 | 0.061253807 | 0.815954500 | 0.075070125 | Purification selection |
| <i>AtIDD8 / BoIDD8</i>         | 83.475 | 0.066819183 | 0.510542686 | 0.130878738 | Purification selection |
| <i>AtADG1 / BoADG1-1</i>       | 91.188 | 0.043036288 | 0.593963011 | 0.072456176 | Purification selection |
| <i>AtPGM1 / BoPGM</i>          | 92.540 | 0.030784565 | 0.258696710 | 0.118998671 | Purification selection |
| <i>AtTPS1 / BrTPS1-1</i>       | 90.862 | 0.026189111 | 0.458301878 | 0.057143801 | Purification selection |
| <i>AtTPS1 / BrTPS1-2</i>       | 90.967 | 0.025208384 | 0.395376097 | 0.063757986 | Purification selection |
| <i>AtSNRK1.1 / BrSNRK1.1-1</i> | 96.491 | 0.020409423 | 0.448233073 | 0.045533058 | Purification selection |

|                                |        |             |             |             |                        |
|--------------------------------|--------|-------------|-------------|-------------|------------------------|
| <i>AtSNRK1.1 / BrSNRK1.1-2</i> | 94.553 | 0.022054012 | 0.426661883 | 0.051689670 | Purification selection |
| <i>AtSNRK1.1 / BrSNRK1.1-3</i> | 83.178 | 0.054675538 | 0.350843509 | 0.155840244 | Purification selection |
| <i>AtPGII / BrPGII-1</i>       | 88.817 | 0.055393667 | 0.428558370 | 0.129255829 | Purification selection |
| <i>AtPGII / BrPGII-2</i>       | 90.280 | 0.039502423 | 0.479011438 | 0.082466555 | Purification selection |
| <i>AtH XK1 / BrH XK1-1</i>     | 89.091 | 0.062834942 | 0.791996084 | 0.079337441 | Purification selection |
| <i>AtH XK1 / BrH XK1-2</i>     | 89.006 | 0.058404221 | 0.773309913 | 0.075524987 | Purification selection |
| <i>AtIDD8 / BrIDD8</i>         | 81.568 | 0.070950392 | 0.536154259 | 0.132332050 | Purification selection |
| <i>AtADG1 / BrADG1-1</i>       | 87.739 | 0.082251649 | 2.062148102 | 0.039886393 | Purification selection |
| <i>AtPGM1 / BrPGM</i>          | 91.843 | 0.053214663 | 0.304380839 | 0.174829216 | Purification selection |

---
